# Supplementary material
Source: publisher site journal article supplement (https://www.spandidos-publications.com/3617/downloadSupplementary)

Figure S1. Transfection efficiency for si-p65 and pcDNA3.1-I $\kappa$ B $\alpha$  in PMVECs. (A) Western blots of p65 protein expression in con-siRNA and p65siRNA transfected cells. (B) Western blots of p-I $\kappa$ B $\alpha$  protein expression in pcDNA3.1-I $\kappa$ B $\alpha$ -wt and pcDNA3.1-I $\kappa$ B $\alpha$ -M transfected cells. Each value represents the mean  $\pm$  SD of three independent experiments. \*\*P<0.05 vs. the control group. PMVEC, pulmonary microvascular endothelial cells; p, phosphorylated; si/siRNA; small interfering RNA; wt, wild-type; M, mutant; con, control.

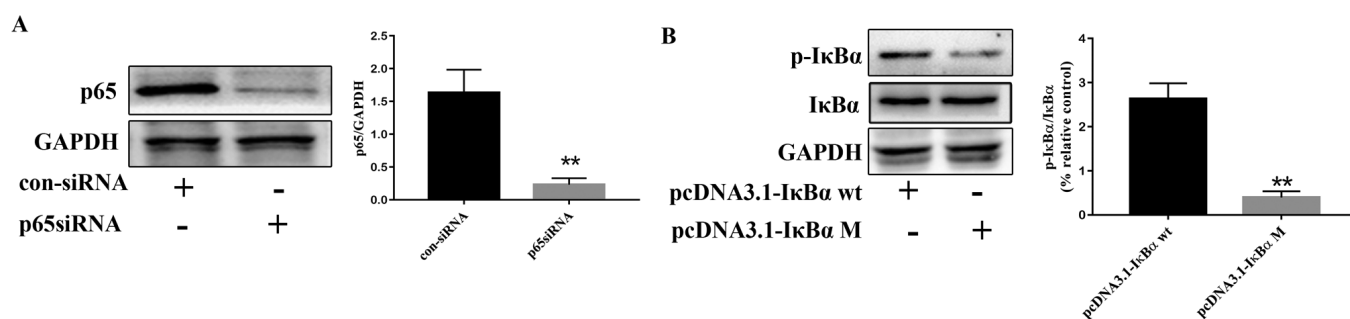

Supplement: Supplementary file 1 [file downloadSupplementary]
